# Supplementary material for: Optical Coherence Tomography Angiography–Derived Flux As a Measure of Physiological Changes in Retinal Capillary Blood Flow
Source: PubMed Central journal article supplement — Transl Vis Sci Technol. 2021 Aug 3;10(9):5. doi: 10.1167/tvst.10.9.5 (PMC8340668; doi:10.1167/tvst.10.9.5), 2021-08-03
Supplement: tvst-10-9-5_s001.pdf [file tvst-10-9-5_s001.pdf]

## Supplementary Material

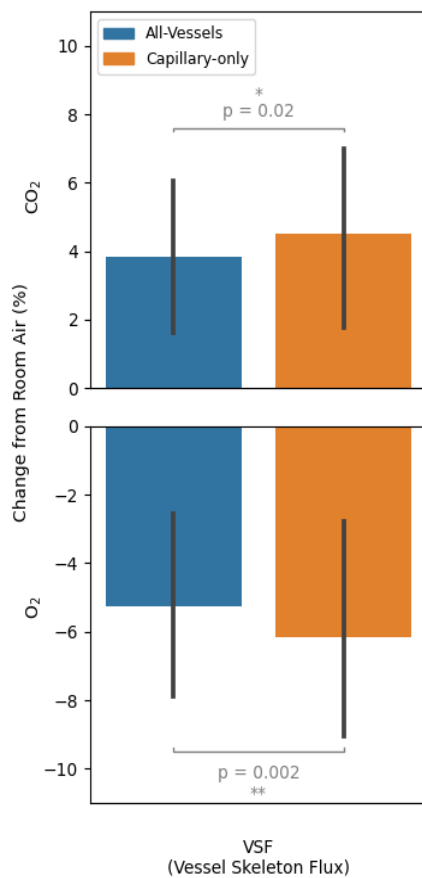

**Figure S1.** Comparison of the change in OCTA derived VSF (vessel skeleton flux) in all-vessels (including arterioles and venules) versus capillary-only images. (Mean and 95% CI of mean are shown)

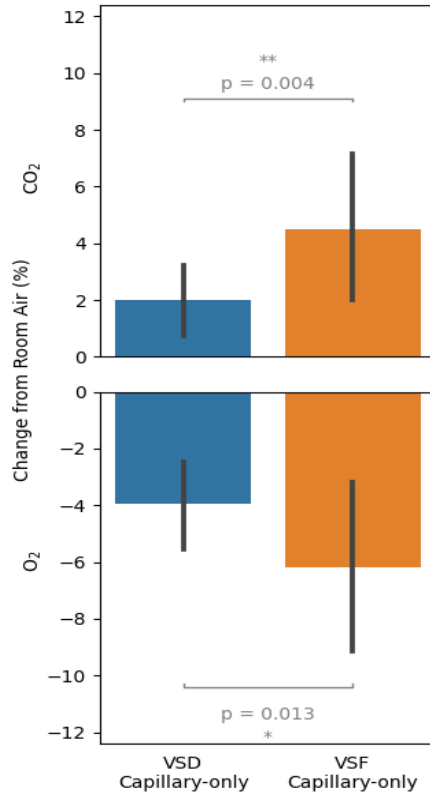

**Figure S2.** Comparison of the change in OCTA derived VSD (vessel skeleton density) and VSF (vessel skeleton flux) measures in capillary-only images. (Mean and 95% CI of mean are shown)

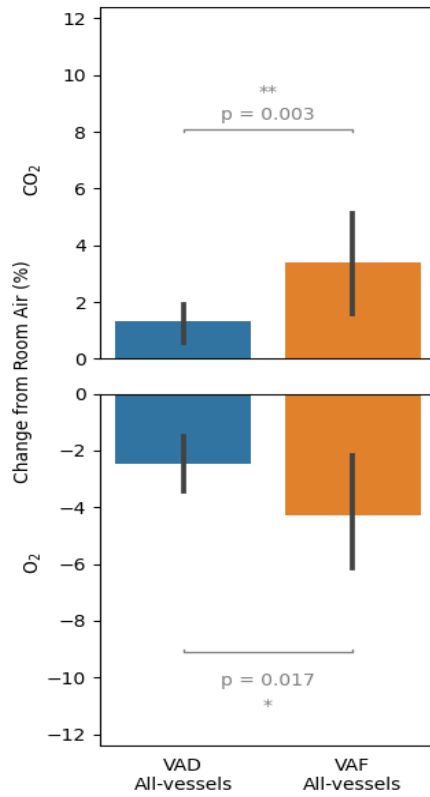

**Figure S3.** Comparison of the change in OCTA derived VAD (vessel area density) and VAF (vessel area flux) measures in all-vessels (including arterioles and venules) images. (Mean and 95% CI of mean are shown)

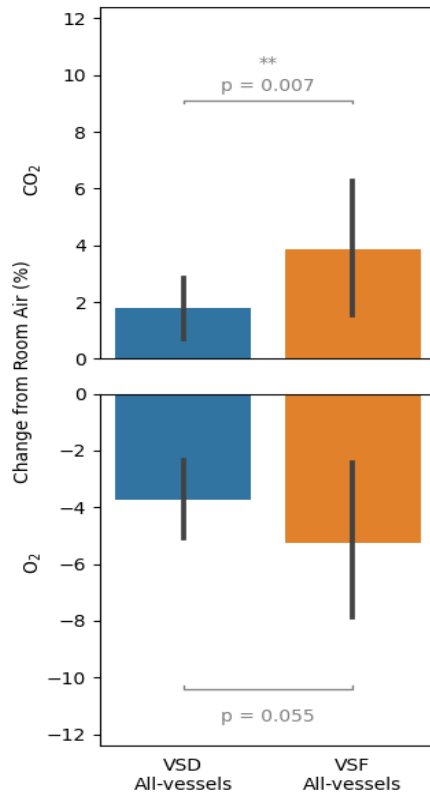

**Figure S4.** Comparison of the change in OCTA derived VSD (vessel skeleton density) and VSF (vessel skeleton flux) measures in all-vessels (including arterioles and venules) images. (Mean and 95% CI of mean are shown)

**Figure S5.** Bland–Altman plot of OCTA derived perfusion measures for capillary-only images. (Mean and 95% CI lines are shown. VAD: vessel area density, VSD: vessel skeleton density, VAF: vessel area flux, VSF: vessel skeleton flux)

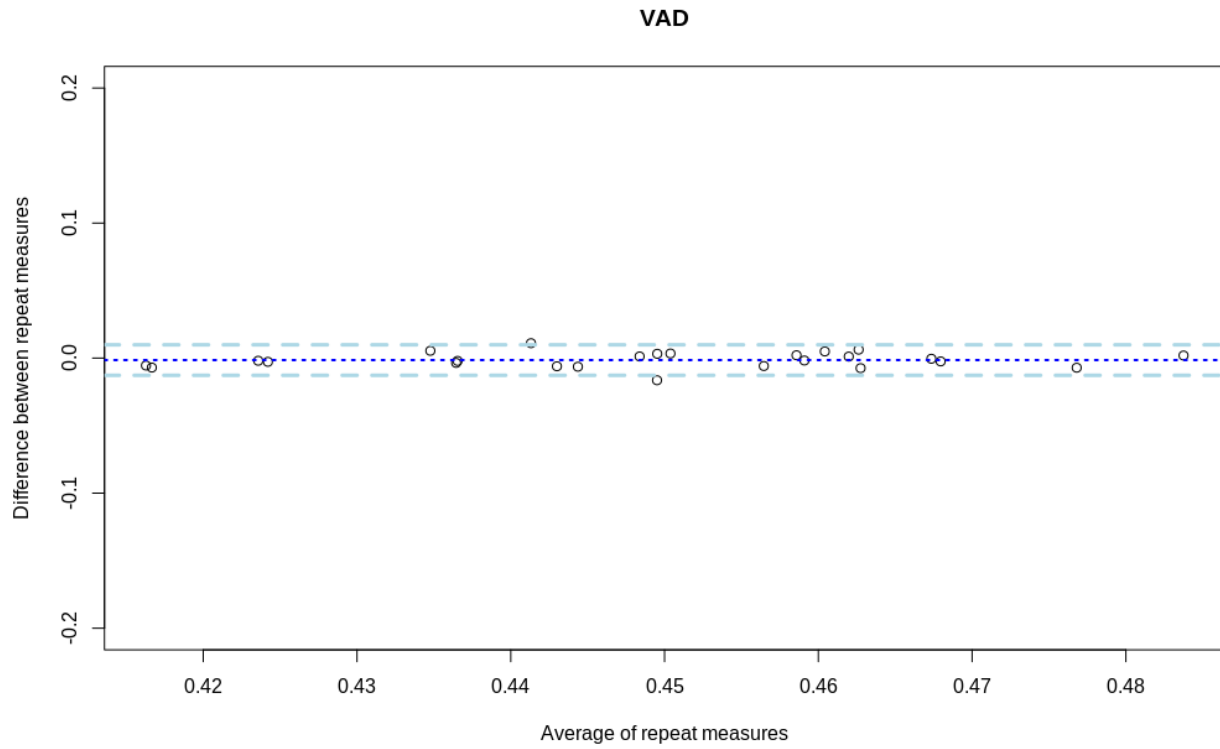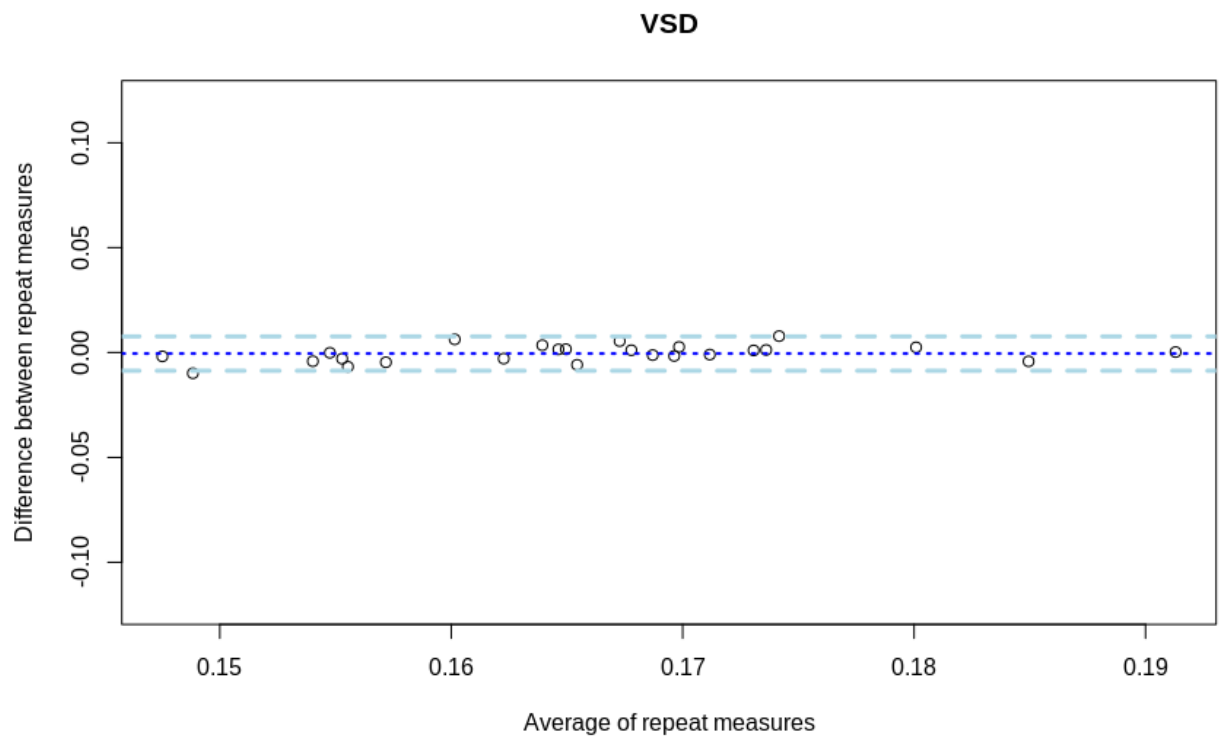

### VAF

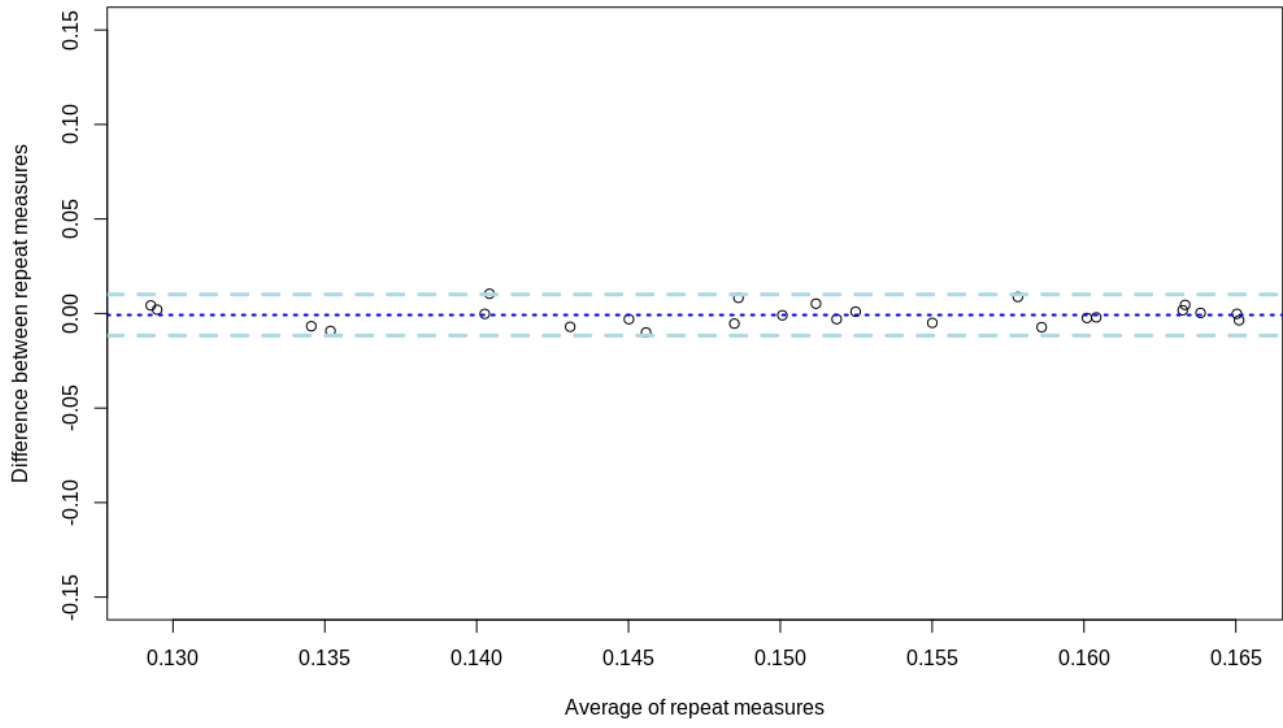

### VSF

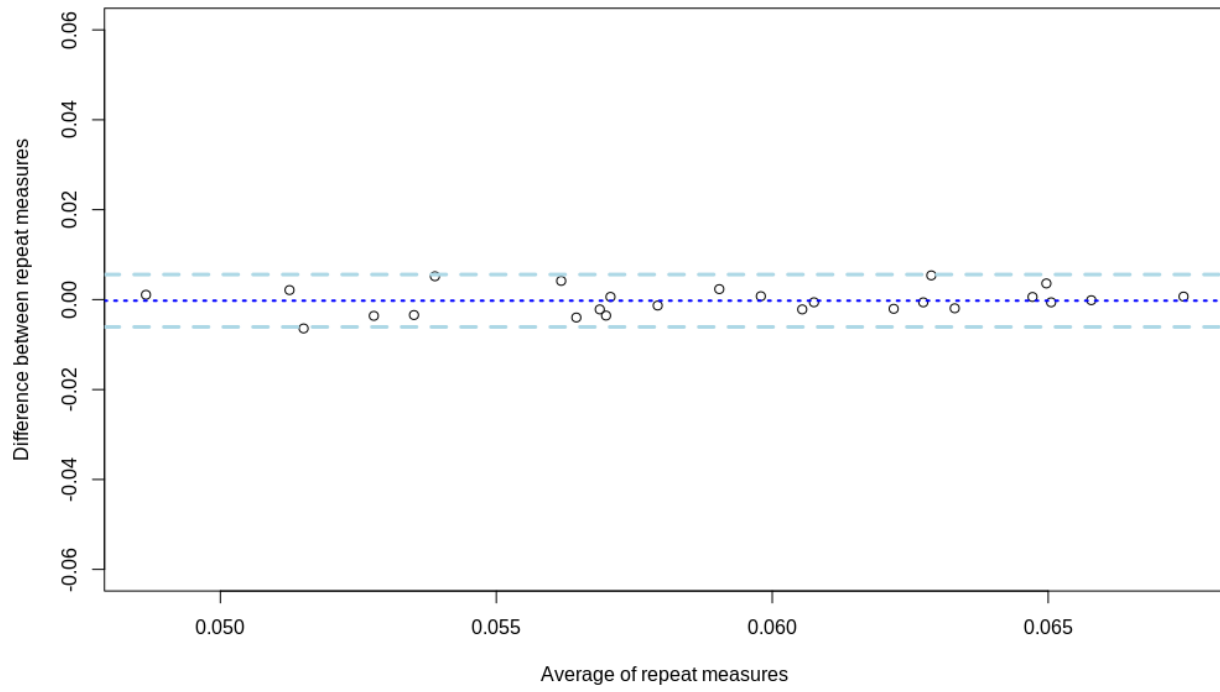

**Table S1.** Values ( $\pm$  SD) of retinal perfusion measures in all-vessels and capillary-only images in all breathing conditions.

|            | <b>All-vessels</b> |               |                | <b>Capillary-only</b> |               |                |
|------------|--------------------|---------------|----------------|-----------------------|---------------|----------------|
|            | CO <sub>2</sub>    | RA            | O <sub>2</sub> | CO <sub>2</sub>       | RA            | O <sub>2</sub> |
| <b>VAD</b> | 0.466 (0.015)      | 0.46 (0.015)  | 0.449 (0.02)   | 0.456 (0.017)         | 0.45 (0.018)  | 0.437 (0.023)  |
| <b>VSD</b> | 0.165 (0.009)      | 0.162 (0.009) | 0.156 (0.011)  | 0.169 (0.01)          | 0.166 (0.011) | 0.159 (0.013)  |
| <b>VAF</b> | 0.177 (0.009)      | 0.172 (0.012) | 0.165 (0.014)  | 0.156 (0.008)         | 0.151 (0.011) | 0.143 (0.014)  |
| <b>VSF</b> | 0.066 (0.004)      | 0.064 (0.005) | 0.06 (0.006)   | 0.061 (0.004)         | 0.059 (0.005) | 0.055 (0.006)  |
